# Supplementary material for: Hematopoietic Prostaglandin D Synthase Inhibitor PK007 Decreases Muscle Necrosis in DMD mdx Model Mice
Source: MDPI journal article supplement (doi:10.3390/life11090994), 2021-09-21
Supplement: s1 [file s1]

**Supplementary Table S1:** Safety panel screen of PK007 on 44 targets, recommended by major pharmaceutical companies, measuring activity (as % inhibition) – performed at Eurofins Cerep-Panlabs, Taiwan.

| Compound: PK007 |                                                        |        |       |      |            |              |
|-----------------|--------------------------------------------------------|--------|-------|------|------------|--------------|
| Cat #           | Assay Name                                             | Batch  | Spec. | Rep. | Conc.      | % Inhibition |
| 104010          | Cholinesterase, Acetyl, ACS                            | 438345 | hum   | 2    | 10 $\mu$ M | 40           |
| 116030          | Cyclooxygenase COX-1                                   | 438269 | hum   | 2    | 10 $\mu$ M | -15          |
| 118010          | Cyclooxygenase COX-2                                   | 438270 | hum   | 2    | 10 $\mu$ M | -5           |
| 140010          | Monoamine Oxidase MAO-A                                | 438258 | hum   | 2    | 10 $\mu$ M | 8            |
| 152300          | Phosphodiesterase PDE3A                                | 438260 | hum   | 2    | 10 $\mu$ M | -2           |
| 154420          | Phosphodiesterase PDE4D2                               | 438261 | hum   | 2    | 10 $\mu$ M | 1            |
| 176020          | Protein Tyrosine Kinase, LCK                           | 438201 | hum   | 2    | 10 $\mu$ M | 24           |
| 200610          | Adenosine A2A                                          | 438217 | hum   | 2    | 10 $\mu$ M | 15           |
| 203100          | Adrenergic $\alpha$ 1A                                 | 438284 | rat   | 2    | 10 $\mu$ M | 1            |
| 203630          | Adrenergic $\alpha$ 2A                                 | 438239 | hum   | 2    | 10 $\mu$ M | 5            |
| 204010          | Adrenergic $\beta$ 1                                   | 438227 | hum   | 2    | 10 $\mu$ M | 2            |
| 204110          | Adrenergic $\beta$ 2                                   | 438210 | hum   | 2    | 10 $\mu$ M | 1            |
| 206000          | Androgen (Testosterone)                                | 438399 | hum   | 2    | 10 $\mu$ M | 22           |
| 214600          | Calcium Channel L-Type, Dihydropyridine                | 438340 | rat   | 2    | 10 $\mu$ M | 22           |
| 217030          | Cannabinoid CB1                                        | 438347 | hum   | 2    | 10 $\mu$ M | -2           |
| 217100          | Cannabinoid CB2                                        | 438347 | hum   | 2    | 10 $\mu$ M | 8            |
| 218030          | Cholecystokinin CCK1 (CCKA)                            | 438289 | hum   | 2    | 10 $\mu$ M | 12           |
| 219500          | Dopamine D1                                            | 438231 | hum   | 2    | 10 $\mu$ M | -10          |
| 219700          | Dopamine D2S                                           | 438256 | hum   | 2    | 10 $\mu$ M | 19           |
| 224010          | Endothelin ETA                                         | 438402 | hum   | 2    | 10 $\mu$ M | -5           |
| 226600          | GABAA, Flunitrazepam, Central                          | 438210 | rat   | 2    | 10 $\mu$ M | 10           |
| 232030          | Glucocorticoid                                         | 438291 | hum   | 2    | 10 $\mu$ M | 14           |
| 232810          | Glutamate, NMDA, Agonism                               | 438304 | rat   | 2    | 10 $\mu$ M | 3            |
| 239610          | Histamine H1                                           | 438360 | hum   | 2    | 10 $\mu$ M | 5            |
| 239710          | Histamine H2                                           | 438227 | hum   | 2    | 10 $\mu$ M | -8           |
| 252610          | Muscarinic M1                                          | 438212 | hum   | 2    | 10 $\mu$ M | -7           |
| 252710          | Muscarinic M2                                          | 438213 | hum   | 2    | 10 $\mu$ M | -3           |
| 252810          | Muscarinic M3                                          | 438214 | hum   | 2    | 10 $\mu$ M | -8           |
| 299031          | Nicotinic Acetylcholine $\alpha$ 4 $\beta$ 2, Cytisine | 438311 | hum   | 2    | 10 $\mu$ M | 8            |
| 260130          | Opiate $\delta$ 1 (OP1, DOP)                           | 438239 | hum   | 2    | 10 $\mu$ M | 5            |
| 260210          | Opiate $\kappa$ (OP2, KOP)                             | 438296 | hum   | 2    | 10 $\mu$ M | 14           |
| 260410          | Opiate $\mu$ (OP3, MOP)                                | 438296 | hum   | 2    | 10 $\mu$ M | 11           |
| 265910          | Potassium Channel hERG, [3H] Dofetilide                | 438276 | hum   | 2    | 10 $\mu$ M | 14           |
| 265510          | Potassium Channel [KA]                                 | 438293 | rat   | 2    | 10 $\mu$ M | -5           |
| 271110          | Serotonin (5-Hydroxytryptamine) 5-HT1A                 | 438367 | hum   | 2    | 10 $\mu$ M | 7            |
| 271230          | Serotonin (5-Hydroxytryptamine) 5-HT1B                 | 438254 | hum   | 2    | 10 $\mu$ M | 9            |
| 271650          | Serotonin (5-Hydroxytryptamine) 5-HT2A                 | 438299 | hum   | 2    | 10 $\mu$ M | 10           |
| 271700          | Serotonin (5-Hydroxytryptamine) 5-HT2B                 | 438235 | hum   | 2    | 10 $\mu$ M | 67           |
| 271910          | Serotonin (5-Hydroxytryptamine) 5-HT3                  | 438299 | hum   | 2    | 10 $\mu$ M | 7            |
| 279510          | Sodium Channel, Site 2                                 | 438310 | rat   | 2    | 10 $\mu$ M | 48           |
| 220320          | Transporter, Dopamine (DAT)                            | 438233 | hum   | 2    | 10 $\mu$ M | -11          |
| 204410          | Transporter, Norepinephrine (NET)                      | 438229 | hum   | 2    | 10 $\mu$ M | 15           |
| 274030          | Transporter, Serotonin (5- Hydroxytryptamine)          | 438305 | hum   | 2    | 10 $\mu$ M | -10          |
| 287530          | Vasopressin V1A                                        | 438470 | hum   | 2    | 10 $\mu$ M | -12          |

**Foot note:** For receptor assays, compound binding was calculated as percent inhibition of the binding of radioactively labelled ligand specific for each target. For enzyme assays, the inhibition effect was calculated as percent inhibition of control enzyme activity.

**Supplementary Table S2: Summary of statistical levels**

|          | <b>Variable</b>                     | <b>Test</b>              | <b>Mean</b>                                                                                                                                                          | <b>SEM</b>                                                                                                                                           | <b>n</b> | <b>p value</b>                 |
|----------|-------------------------------------|--------------------------|----------------------------------------------------------------------------------------------------------------------------------------------------------------------|------------------------------------------------------------------------------------------------------------------------------------------------------|----------|--------------------------------|
| Figure 1 | Body Weight<br>(Day 1 and Day 10)   | 2 Way ANOVA              | <i>mdx</i> Vehicle: 9.73 g and 13 g<br><i>mdx</i> PK007: 9.88 g and 14.05 g<br>WT-Vehicle: 9.49 g and 14.0 g<br>WT-PK007: 10.61g and 15.45 g                         | <i>mdx</i> Vehicle: 1.02 g and 1.24 g<br><i>mdx</i> PK007: 1.42 g and 1.73 g<br>WT-Vehicle: 1.30 g and 1.73 g<br>WT-PK007: 0.85 g and 1.74 g         | 6        | p>0.05                         |
| Figure 2 | Grip Strength<br>(Day 1 and Day 10) | 2 Way ANOVA              | <i>mdx</i> Vehicle: 0.237 N and 0.372 N<br><i>mdx</i> PK007: 0.302 N and 0.650 N<br>WT-Vehicle Treated: 0.368 N and 0.640 N<br>WT-PK007 Treated: 0.340 N and 0.587 N | <i>mdx</i> Vehicle: 0.019 N and 0.019 N<br><i>mdx</i> PK007: 0.017 N and 0.030 N<br>WT-Vehicle: 0.023 N and 0.042 N<br>WT-PK007: 0.025 N and 0.022 N | 6        | ***<0.0001                     |
| Figure 3 | Regenerating Muscle fibres (TA)     | 2 Way ANOVA              | <i>mdx</i> Vehicle: 73.29%<br><i>mdx</i> PK007: 54.66%<br>WT-Vehicle: 1.60%<br>WT-PK007: 1.07%                                                                       | <i>mdx</i> Vehicle: 4.89%<br><i>mdx</i> PK007: 5.89%<br>WT-Vehicle: 0.16%<br>WT-PK007: 0.18%                                                         | 6        | * 0.0353<br>***<0.0001         |
| Figure 4 | Regenerating Muscle fibres (GA)     | 2 Way ANOVA              | <i>mdx</i> Vehicle: 57.72%<br><i>mdx</i> PK007 Treated: 38.33%<br>WT-Vehicle: 1.38%<br>WT-PK007: 1.54%                                                               | <i>mdx</i> Vehicle: 5.78%<br><i>mdx</i> PK007: 4.66%<br><i>mdx</i> WT-Vehicle: 0.12 %<br><i>mdx</i> WT-PK007: 0.21%                                  | 6        | ** 0.0036<br>***<0.0001        |
| Figure 5 | Fibrosis TA muscle                  | 2 Way ANOVA              | <i>mdx</i> Vehicle: 9.82%<br><i>mdx</i> PK007: 3.12%<br>WT-Vehicle: 0.77%<br>WT-PK007: 0.59%                                                                         | <i>mdx</i> Vehicle: 7.41%<br><i>mdx</i> PK007: 3.60%<br>WT-Vehicle: 1.03%<br>WT-PK007: 0.27%                                                         | 6        | *0.0376<br>**0.002<br>**0.0025 |
| Figure 6 | Fibrosis GA Muscle                  | un-paired <i>t</i> -test | <i>mdx</i> Vehicle: 5.90%<br><i>mdx</i> PK007: 5.58%                                                                                                                 | <i>mdx</i> Vehicle: 4.44%<br><i>mdx</i> PK007: 2.61%                                                                                                 | 6        | 0.8826                         |
| Figure 7 | CK-MM                               | un-paired <i>t</i> -test | <i>mdx</i> Vehicle: 0.002705 mU/ml<br><i>mdx</i> PK007: 0.001094 mU/ml                                                                                               | N/A                                                                                                                                                  | 5/6      | 0.0196                         |

**Supplementary Figure S1: Potency of PK007 and HQL-79 in HPGDS enzyme assay**

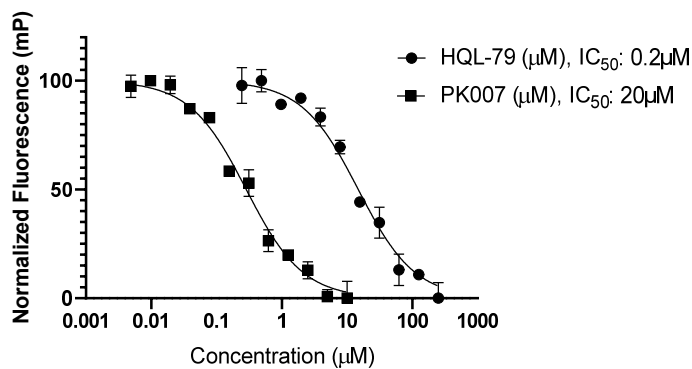

**Supplementary Figure S2: Example of a score sheet to assess the wellbeing of *mdx* mice when treated with PK007 or Vehicle:**

Experimental/ Treatment Group:

Date:

Time:

AEC Number:

Name of person scoring:

Name of Supervisor/Chief Investigator:

Contact Telephone Number:

After Hours:

| Indicators     | Scoring of independent variables:                                                                                                      | Score of each animal in group |  |  |  |  |  |
|----------------|----------------------------------------------------------------------------------------------------------------------------------------|-------------------------------|--|--|--|--|--|
| Date           |                                                                                                                                        |                               |  |  |  |  |  |
| General Health |                                                                                                                                        |                               |  |  |  |  |  |
| Eating         | 0. drinking and eating well<br>1. change in eating or drinking habit<br>2. inappetance.<br>3. not eating/drinking, severely dehydrated |                               |  |  |  |  |  |
| Locomotion     | 0. walking normally<br>1. limping, stiffness<br>2. swollen limbs<br>3. severely restricted mobility                                    |                               |  |  |  |  |  |
| Behaviour:     | 0. normal<br>1. away from littermates<br>2. aggressive or huddled in corner<br>3. severe distress                                      |                               |  |  |  |  |  |
| Appearance     | 0. Normal<br>1. ruffled fur<br>2. animal appears depressed , hunched, reluctant to move)<br>3. animal appears severely depressed.      |                               |  |  |  |  |  |
| Weight loss    | 0. normal<br>1. 5 – 9%<br>2. 10-14%<br>3. $\geq 15\%$                                                                                  |                               |  |  |  |  |  |

**Supplementary Figure S3:** Pharmacokinetics of PK007 in male Sprague Dawley rats following a single oral dose at 10 mg/kg.

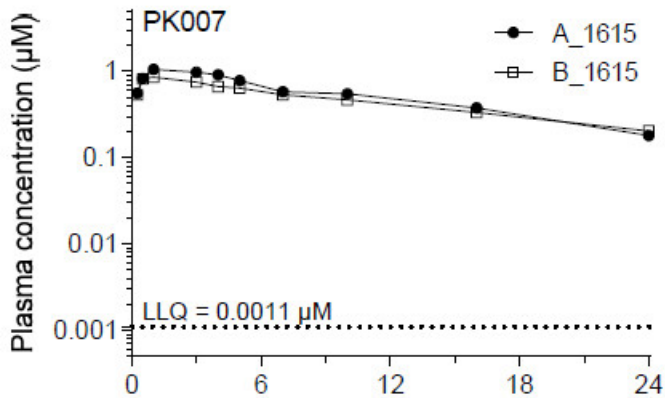

| Parameter                                         | PK007 |
|---------------------------------------------------|-------|
| Potency ( $\mu\text{M}$ )                         | 0.2   |
| $T_{1/2}$ (hrs)                                   | 11.0  |
| $C_{\text{max}}$ ( $\mu\text{M}$ )                | 1.0   |
| $\text{AUC}_{0-\text{inf}}(\text{h}*\mu\text{M})$ | 15.0  |
